# Supplementary material for: Human umbilical cord mesenchymal stem cell-derived exosomes ameliorate liver steatosis by promoting fatty acid oxidation and reducing fatty acid synthesis
Source: PubMed Central journal article supplement — JHEP Rep. 2023 Mar 28;5(7):100746. doi: 10.1016/j.jhepr.2023.100746 (PMC10232730; doi:10.1016/j.jhepr.2023.100746), 2023-03-28
Supplement: mmc1.pdf [file mmc1.pdf]

**Human umbilical cord mesenchymal stem cell-derived exosomes  
ameliorate liver steatosis by promoting fatty acid oxidation and reducing  
fatty acid synthesis**

Fuji Yang, Yanshuang Wu, Yifei Chen, Jianbo Xi, Ying Chu, Jianhua Jin, Yongmin

Yan

**Table of contents**

|         |   |
|---------|---|
| Fig. S1 | 2 |
| Fig. S2 | 3 |
| Fig. S3 | 4 |
| Fig. S4 | 6 |
| Fig. S5 | 7 |
| Fig. S6 | 9 |

Fig. S1

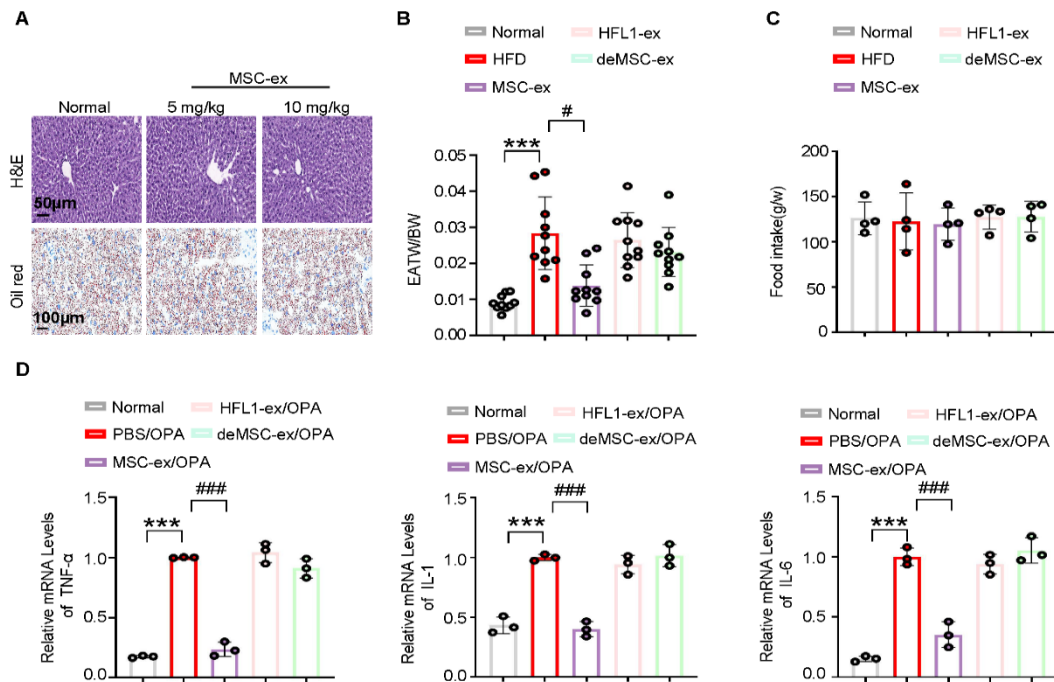

**Fig. S1 MSC-ex inhibits weight gain of inguinal adipose tissue and inflammation in livers of HFD mice**

**(A)** C57BL/6 mice were placed on high-fat diet (HFD, 40%) and administered 5 mg/kg and 10 mg/kg of MSC-ex *i.v.* From the 10th week to the 14th week of HFD feeding. Representative Images of Haematoxylin and eosin (H&E; upper; Scale bars, 50 µm) and oil red O (bottom; Scale bars, 20 µm) staining of liver sections. **(B)** Changes in the EATW/BW of mice (EATW/BW = relative weight of epididymal adipose tissue to body weight). **(C)** The food consumption was measured by weighing the food used. **(D)** Inflammatory transcription factor expression at mRNA level (n=3 in each group). Data are represented as the mean ± s.e.m. Statistical analyses was performed by a one-way ANOVA (panels **B-D**). \*\*\*  $P < 0.001$  versus normal chow diet group; #  $P < 0.05$ , ###  $P < 0.001$  versus HFD group.

Fig. S2

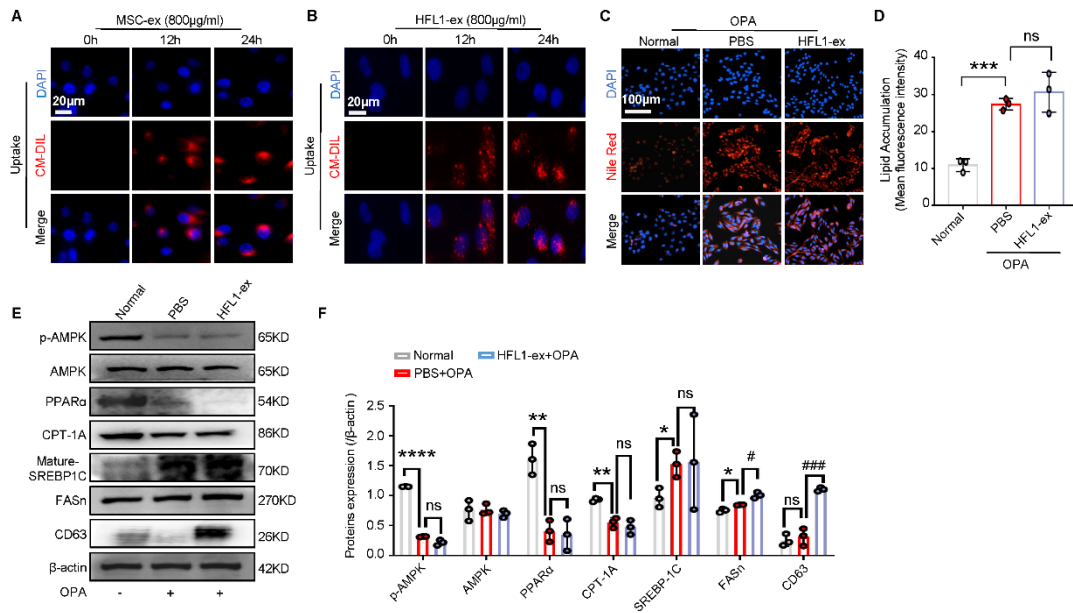

**Fig. S2 HFL1-ex inactivates the AMPK signaling pathway and increases lipid accumulation (A-B)** Representative fluorescent images of CM-DIL labeled MSC-ex (A) and HFL1-ex (B) in L02 cells at 0, 12, and 24 h. Scale bars, 100µm. (C-D) The intracellular lipid droplets in L02 cells subjected to oleate and palmitate (OPA) stimulation (2.0 mM, 2:1 ratio) in combination with HFL1-ex (800 µg/ml) or PBS treatment for 24 h were visualized by Nile red staining (C) and quantified by Image J for three random areas (D). Scale bars, 100 µm. (E-F) Immunoblotting of AMPK pathway proteins in L02 cells subjected to OPA stimulation (2.0 mM, 2:1 ratio) combined with HFL1-ex (800 µg/ml) or PBS treatment for 24 h (E) and quantification of the results (F). Data are represented as the mean ± s.e.m. Statistical analyses was performed by a one-way ANOVA (D and F). \*  $P < 0.05$ , \*\*  $P < 0.01$ , \*\*\*  $P < 0.001$ , \*\*\*\*  $P < 0.0001$  versus normal group; #  $P < 0.05$ , ###  $P < 0.001$  versus PBS group.

Fig. S3

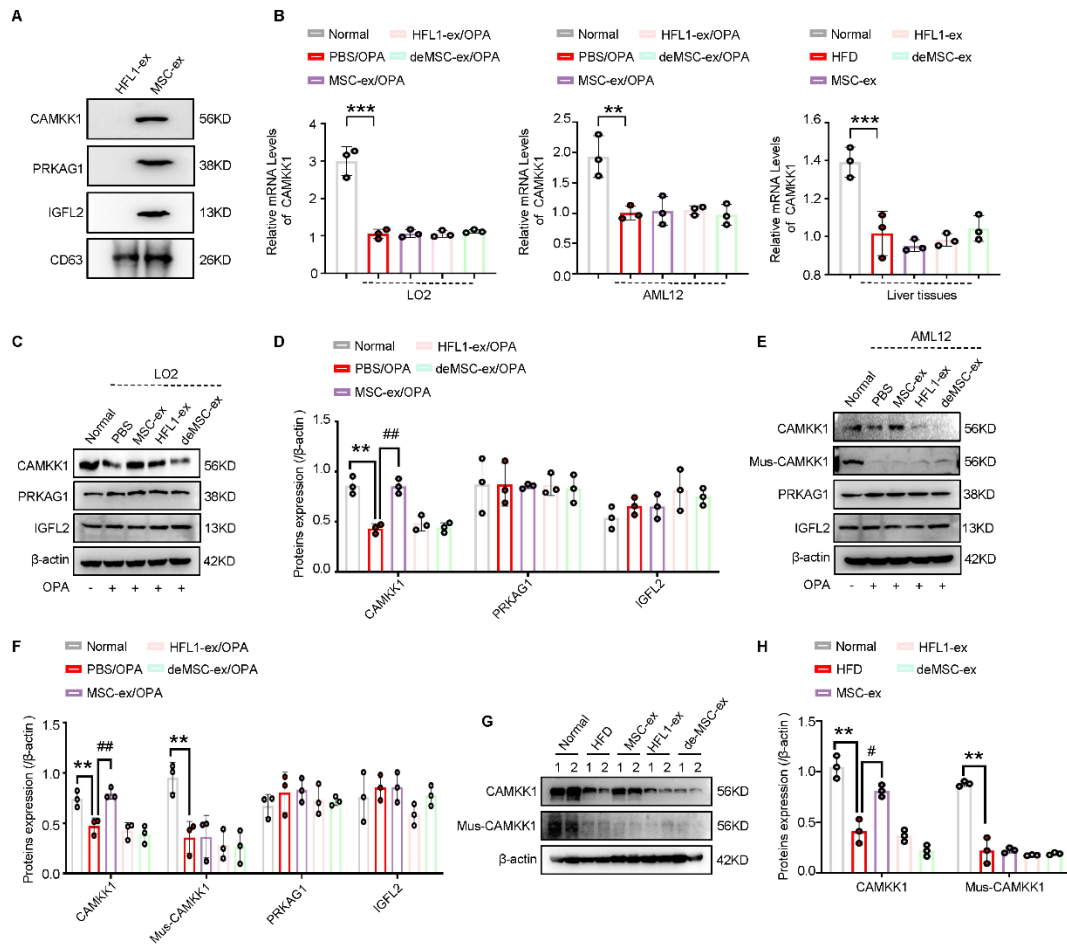

**Fig. S3 Expression of CAMKK1 in HFL1-ex/MSC-ex, HFL1-ex/MSC-ex treated hepatocytes and livers**

(A) CAMKK1, PRKAG1, and IGFL2 expression in MSC-ex and HFL1-ex were examined by immunoblotting. (B) QRT-PCR analyses of CAMKK1 mRNA expression (n=3 biological replicates per group). \*\*  $P < 0.01$ , \*\*\*  $P < 0.001$  versus normal group. (C-D) The expression of CAMKK1, PRKAG1, and IGFL2 in L02 cells was detected by immunoblotting (C) and quantified (D). \*\*  $P < 0.01$  versus normal group; ##  $P < 0.01$  versus PBS group. (E-F) The expression of CAMKK1, PRKAG1, and IGFL2 in AML12 cells was detected by immunoblotting (E) and quantified (F). \*\*  $P < 0.01$  versus normal group; ##  $P < 0.01$  versus PBS group. (G-H) Immunoblotting analyses of CAMKK1 and

Mus-CAMKK1 proteins in mice placed on a HFD diet for 10 weeks followed by 10 mg/kg MSC-ex or 10 mg/kg HFL1-ex or MSC-ex-free conditional medium supernatant (deMSC-ex) and PBS treatment for 4 weeks (**G**) and quantification of the results (**H**).

\*\*  $P < 0.01$  versus normal chow diet group; #  $P < 0.05$  versus HFD group. Data are represented as the mean  $\pm$  s.e.m. Statistical analyses was performed by a one-way ANOVA (**B**, **D**, **F**, and **H**).

Fig. S4

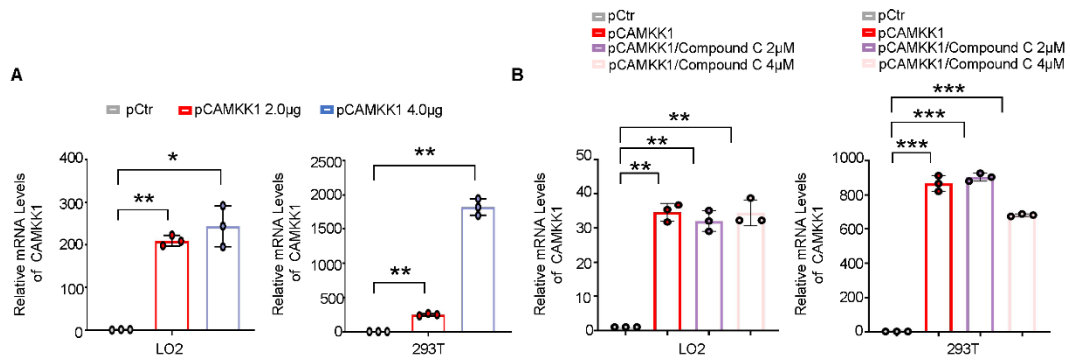

**Fig. S4 CAMKK1 expression is not affected by Compound-C**

**(A)** QRT-PCR analyses of CAMKK1 mRNA expression in L02 and 293T cells transfected with pCAMKK1 (2 µg and 4 µg) or empty plasmid (pCtr) and normalized to β-actin expression. n=3 biological replicates per group. **(B)** QRT-PCR analyses of CAMKK1 mRNA expression in L02 and 293T cells transfected with pCAMKK1 (4 µg) or pCtr with or without Compound-C (2 µM and 4 µM) treatment for 24 h. Expression was normalized to β-actin expression. n=3 biological replicates per group. Data are represented as the mean ± s.e.m. Statistical analyses by unpaired two-tailed student's t-test. \*  $P < 0.05$ , \*\*  $P < 0.01$ , \*\*\*  $P < 0.001$  versus pCtr group.

Fig. S5

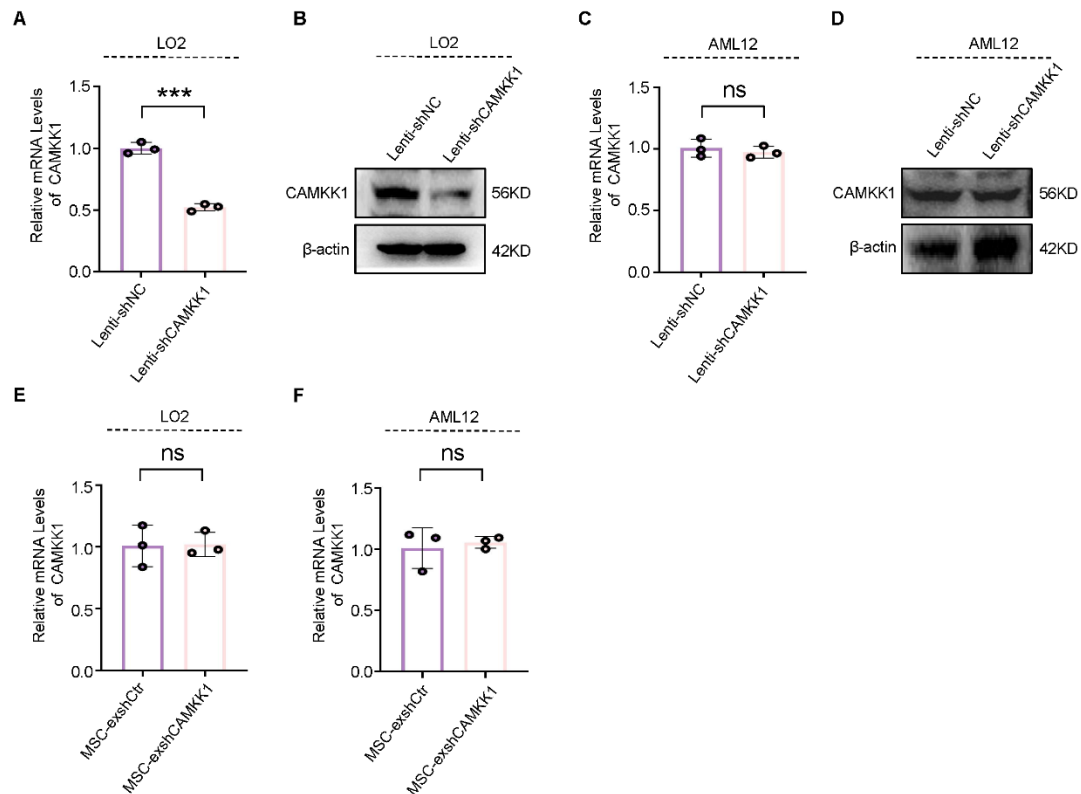

**Fig. S5 Identification of CAMKK1 Knockdown in Lenti-shCAMKK1 transfected hepatocytes and MSC-ex<sup>shCAMKK1</sup> treated hepatocytes (A)** QRT-PCR analyses of CAMKK1 mRNA expression in L02 cells treated with recombinant lentivirus (pLKO) (pLKO.1-GFP-Puro-shCAMKK1 or pLKO.1-Puro-shRNA, 15MOI) for 72 h. n=3 in each group; \*\*\*  $P < 0.001$  versus Lenti-shNC group. **(B)** The expression of CAMKK1 in L02 cells was detected by immunoblotting. **(C)** QRT-PCR analyses of CAMKK1 mRNA expression in AML12 cells treated with recombinant lentivirus (pLKO) (pLKO.1-GFP-Puro-shCAMKK1 or pLKO.1-Puro-shRNA, 15MOI) for 72 h. n=3 in each group. **(D)** The expression of CAMKK1 in AML12 cells was detected by immunoblotting. **(E)** QRT-PCR analyses of CAMKK1 mRNA expression in L02 cells treated with MSC-ex<sup>shCtrl</sup> (800  $\mu$ g/ml) or MSC-ex<sup>shCAMKK1</sup> (800  $\mu$ g/ml) for 24 h. n=3 in each group. **(F)** QRT-PCR

analyses of CAMKK1 mRNA expression in AML12 cells treated with MSC-ex<sup>shCtr</sup> (800 µg/ml) or MSC-ex<sup>shCAMKK1</sup> (800 µg/ml) for 24 h. n=3 in each group. Data are represented as the mean ± s.e.m. Statistical analyses by unpaired two-tailed student's t-test.



Fig. S6

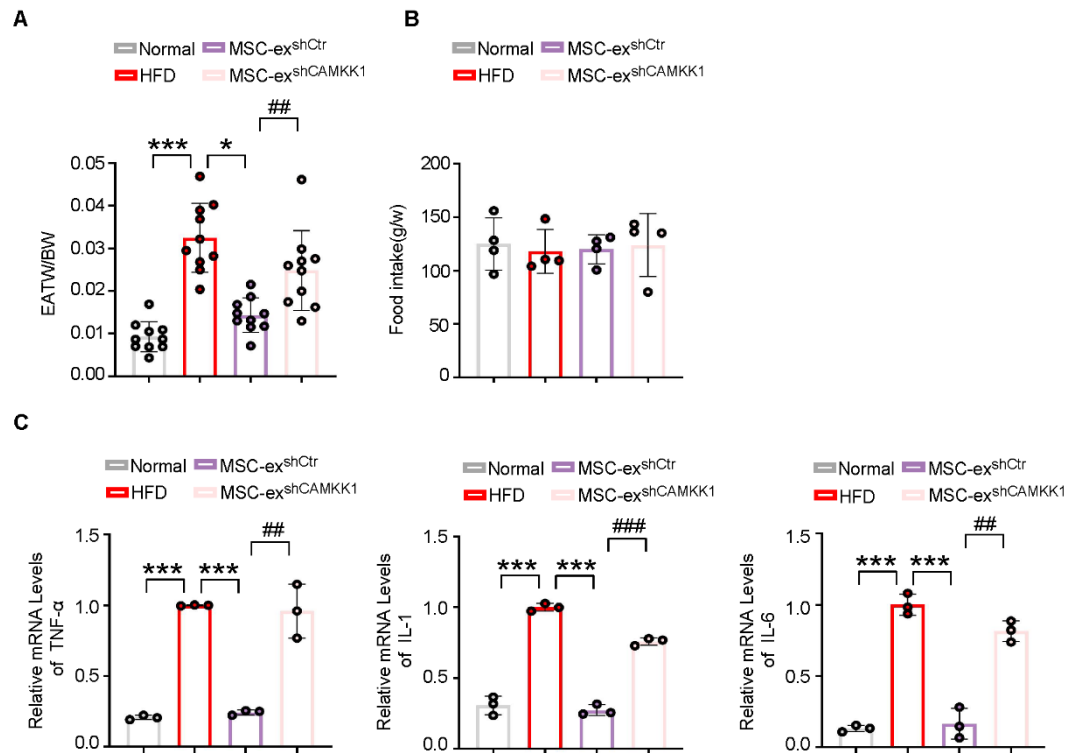

**Fig. S6 MSC-ex<sup>shCAMKK1</sup> reverses MSC-ex<sup>shCtr</sup> decreased hepatic inflammation in the livers from HFD mice**

**(A)** C57BL/6 mice were placed on a high-fat diet (HFD, 40%) and administered 10 mg/kg of MSC-ex<sup>shCtr</sup> or MSC-ex<sup>shCAMKK1</sup> *i.v.* from the 10th week to the 14th week of HFD feeding. As a control, the same volume of PBS was injected. Changes in the EATW/BW of mice (EATW/BW = relative weight of epididymal adipose tissue to body weight). **(B)** The food consumption was measured by weighing the food used. **(C)** Inflammatory transcription factor expression at mRNA level (n=3 in each group). Data are represented as the mean  $\pm$  s.e.m. Statistical analyses was performed by a one-way ANOVA (panels **A-C**). \*  $P < 0.05$ , \*\*\*  $P < 0.001$  versus HFD group; ##  $P < 0.01$ , ###  $P < 0.001$  versus MSC-ex<sup>shCtr</sup> (10 mg/kg) group.
